# Supplementary material for: Effects of abolishing Whi2 on the proteome and nitrogen catabolite repression-sensitive protein production
Source: G3 (Bethesda). 2021 Dec 17;12(3):jkab432. doi: 10.1093/g3journal/jkab432 (PMC9210300; doi:10.1093/g3journal/jkab432)
Supplement: jkab432_Supplementary_Table_S3 [file jkab432_supplementary_table_s3.xlsx]

## Sheet: Fig1A&1C GO
Table S-3
Wild Type and/or whi2D proteins whose levels change after 1 Hr in ME medium compared with those
after one Hr in CSH medium
Terms from the Process Ontology of gene association.sgd with a Corrected p-value less than 0.01
Gene Ontology term	Cluster frequency	Genome frequency	Corrected	FDR	FALSE	Genes annotated to the term
			p-value		Positives
cellular amino acid biosynthetic process	6 of 7 genes, 85.7%	129 of 7166 genes, 1.8%	1.06e-08	0	0	MET17, ARG3, LEU1, YHR208W, CHA1, ARG1
branched-chain amino acid biosynthetic process	3 of 7 genes, 42.9%	16 of 7166 genes, 0.2%	1.62e-05	0	0	LEU1, YHR208W, CHA1
leucine biosynthetic process	2 of 7 genes, 28.6%	7 of 7166 genes, 0.1%	0.00087	0.0014	0.02	LEU1, YHR208W
aspartate family amino acid metabolic process	3 of 7 genes, 42.9%	67 of 7166 genes, 0.9%	0.00135	0.0013	0.02	CHA1, MET17, YHR208W
arginine biosynthetic process	2 of 7 genes, 28.6%	11 of 7166 genes, 0.2%	0.00228	0.0024	0.04	ARG1, ARG3
isoleucine biosynthetic process	2 of 7 genes, 28.6%	11 of 7166 genes, 0.2%	0.00228	0.0022	0.04	CHA1, YHR208W
L-methionine biosynthetic process	2 of 7 genes, 28.6%	12 of 7166 genes, 0.2%	0.00274	0.003	0.06	YHR208W, MET17
*A corrected p-value is the smallest familywise significance level at which a particular comparison will be declared
statistically significant as part of the multiple comparison testing.
