# Supplementary material for: Effects of abolishing Whi2 on the proteome and nitrogen catabolite repression-sensitive protein production
Source: G3 (Bethesda). 2021 Dec 17;12(3):jkab432. doi: 10.1093/g3journal/jkab432 (PMC9210300; doi:10.1093/g3journal/jkab432)
Supplement: jkab432_Supplementary_Table_S5 [file jkab432_supplementary_table_s5.xlsx]

## Sheet: Fig1A&1C GO
Table S-5
Wild Type and/or whi2D proteins whose levels change after six Hrs in ME medium compared with those after one Hr in CSH medium
Terms from the Process Ontology of gene association.sgd with a Corrected p-value less than 0.01
Gene Ontology term	Cluster frequency	Genome frequency	Corrected	FDR	FALSE	Genes annotated to the term
			p-value		Positives
cellular amino acid biosynthetic process	42 of 93 genes, 45.2%	129 of 7166 genes, 1.8%	3.81e-48	0	0	YHR208W, ACO2, LEU1, ARG5,6, IDP1, ILV3, HIS1, ASN1, MET22, CPA2, LEU9, ILV2, MET13, HOM2, ARO3, ARG7, LYS20, TRP4, HIS7, BAT2, LEU4, ARG4, SRY1, AAT2, CPA1, HOM3, SAM4, MET17, ARG8, LYS1, HIS5, ARO9, SER3, MET5, ILV5, ARG1, LYS21, ARO4, SER1, CHA1, ARG3, HIS4
carboxylic acid metabolic process	57 of 93 genes, 61.3%	429 of 7166 genes, 6.0%	2.41e-44	0	0	ARG5,6, GCV1, ILV3, CIT2, YAT2, MET22, CPA2, ARG7, HOM2, LYS20, TRP4, MAE1, SPE1, AAT2, CPA1, HOM3, HIS5, OLE1, GCV3, MET5, ARG1, ILV5, SER1, CHA1, ARG3, HIS4, GCV2, ACO2, YHR208W, LEU1, SNO1, IDP1, BNA1, GDH2, HIS1, ASN1, LEU9, AAT1, ARO3, ALD5, ILV2, MET13, HIS7, ARG4, SRY1, BAT2, LEU4, YBR145W, ARG8, SAM4, MET17, LYS1, ARO9, SER3, FOL2, LYS21, ARO4
aspartate family amino acid biosynthetic process	15 of 93 genes, 16.1%	51 of 7166 genes, 0.7%	1.41e-14	0	0	LYS20, BAT2, LYS21, MET22, HOM2, MET13, LYS1, ARO9, ASN1, ACO2, AAT2, YHR208W, HOM3, SAM4, MET17
branched-chain amino acid biosynthetic process	10 of 93 genes, 10.8%	16 of 7166 genes, 0.2%	2.58e-13	0	0	HOM2, ILV2, LEU1, YHR208W, LEU9, ILV3, CHA1, BAT2, LEU4, ILV5
arginine biosynthetic process	8 of 93 genes, 8.6%	11 of 7166 genes, 0.2%	3.95e-11	0	0	ARG4, ARG1, ARG3, CPA2, CPA1, ARG5,6, ARG8, ARG7
serine family amino acid metabolic process	11 of 93 genes, 11.8%	45 of 7166 genes, 0.6%	2.83e-09	0	0	SER1, HOM2, SRY1, GCV2, CHA1, SAM4, HOM3, MET17, SER3, GCV3, GCV1
isoleucine biosynthetic process	7 of 93 genes, 7.5%	11 of 7166 genes, 0.2%	6.5e-09	0	0	HOM2, ILV3, ILV2, CHA1, BAT2, ILV5, YHR208W
glutamine family amino acid biosynthetic process	9 of 93 genes, 9.7%	26 of 7166 genes, 0.4%	7.65e-09	0	0	ARG8, ARG7, ARG5,6, CPA1, CPA2, ARG3, ARG1, ARG4, IDP1
dicarboxylic acid metabolic process	11 of 93 genes, 11.8%	50 of 7166 genes, 0.7%	9.88e-09	0	0	IDP1, BNA1, MAE1, FOL2, GDH2, AAT2, ARO4, ARO3, AAT1, HOM3, HOM2
sulfur amino acid biosynthetic process	10 of 93 genes, 10.8%	38 of 7166 genes, 0.5%	1.21e-08	0	0	YHR208W, MET22, HOM2, MET13, SAM4, MET17, HOM3, ARO9, BAT2, MET5
drug metabolic process	20 of 93 genes, 21.5%	269 of 7166 genes, 3.8%	5.77e-08	0	0	ALD5, SRY1, BAT2, ADE12, GCV2, MET17, SAM4, SNO1, PDX3, YBR145W, YHR208W, DRE2, MET5, FOL2, ASN1, RIB5, GCV1, GCV3, ARO9, BNA1
lysine biosynthetic process	7 of 93 genes, 7.5%	14 of 7166 genes, 0.2%	6.55e-08	0	0	LYS20, LYS1, ARO9, LYS21, ACO2, HOM3, HOM2
cellular amino acid catabolic process	11 of 93 genes, 11.8%	60 of 7166 genes, 0.8%	8.15e-08	0	0	YBR145W, YHR208W, AAT1, ARO9, GCV3, BNA1, GCV1, GDH2, CHA1, BAT2, GCV2
lysine metabolic process	7 of 93 genes, 7.5%	15 of 7166 genes, 0.2%	1.21e-07	0	0	HOM3, HOM2, LYS21, ACO2, LYS1, LYS20, ARO9
ornithine metabolic process	6 of 93 genes, 6.5%	9 of 7166 genes, 0.1%	1.37e-07	0	0	SPE1, ARG3, ARG5,6, ARG4, ARG7, ARG8
methionine metabolic process	9 of 93 genes, 9.7%	38 of 7166 genes, 0.5%	3.51e-07	0	0	MET13, HOM2, SAM4, MET17, HOM3, YHR208W, MET22, BAT2, ARO9
valine biosynthetic process	5 of 93 genes, 5.4%	6 of 7166 genes, 0.1%	8.18e-07	0	0	YHR208W, BAT2, ILV3, ILV2, ILV5
carboxylic acid catabolic process	12 of 93 genes, 12.9%	99 of 7166 genes, 1.4%	1.69e-06	0	0	GCV2, CHA1, BAT2, AAT1, GDH2, GCV1, GCV3, BNA1, ARO9, YHR208W, AAT2, YBR145W
leucine biosynthetic process	5 of 93 genes, 5.4%	7 of 7166 genes, 0.1%	2.83e-06	0	0	YHR208W, LEU9, BAT2, LEU4, LEU1
alpha-amino acid catabolic process	8 of 93 genes, 8.6%	46 of 7166 genes, 0.6%	4.31e-05	0	0	AAT1, GCV2, CHA1, GDH2, ARO9, BNA1, GCV3, GCV1
histidine biosynthetic process	4 of 93 genes, 4.3%	9 of 7166 genes, 0.1%	0.00132	0	0	HIS5, HIS7, HIS1, HIS4
glycine catabolic process	3 of 93 genes, 3.2%	4 of 7166 genes, 0.1%	0.00349	0	0	GCV2, GCV3, GCV1
