# Supplementary material for: Effects of abolishing Whi2 on the proteome and nitrogen catabolite repression-sensitive protein production
Source: G3 (Bethesda). 2021 Dec 17;12(3):jkab432. doi: 10.1093/g3journal/jkab432 (PMC9210300; doi:10.1093/g3journal/jkab432)
Supplement: jkab432_Supplementary_Table_S6 [file jkab432_supplementary_table_s6.xlsx]

## Sheet: Table 1
Table S-6
All Known and Probable NCR-Sensitive Genes and Those With GATA Elements in Their Promoter Regions
Confirmed NCR-Sensitive
*AGP1	Broad-specificity, low-affinity amino acid permease
ASP3-1	Cell-wall L-asparaginase II involved in asparagine catabolism
ASP3-2	Cell-wall L-asparaginase II involved in asparagine catabolism
ASP3-3	Cell-wall L-asparaginase II involved in asparagine catabolism
ASP3-4	Cell-wall L-asparaginase II involved in asparagine catabolism
ATG14	Autophagy-specific subunit of phosphatidylinositol 3-kinase complex I
*BAT2-SC	Cytosolic branched-chain amino acid (BCAA) aminotransferase
CAN1	Plasma membrane arginine permease
*CAR1-PNC	Arginase, catabolizes arginine to ornithine and urea
CPS1-PNC	Vacuolar carboxypeptidase S
DAL1	Allantoinase; converts allantoin to allantoate in the first step of allantoin degradation
DAL2	Allantoicase; converts allantoate to urea and ureidoglycolate in the second step of allantoin degradation
DAL3	Ureidoglycolate lyase; converts ureidoglycolate to glyoxylate and urea in the third step of allantoin degradation
DAL4	Allantoin permease
DAL5	Allantoate permease
DAL7	Malate synthase
DAL80	Negative regulator of genes in multiple nitrogen degradation pathways
DCG1	Protein of unknown function
DUR1,2-PNC	Urea amidolyase; contains both urea carboxylase and allophanate hydrolase activities
DUR3	Plasma membrane transporter for both urea and polyamines
ECM38	Gamma-glutamyltranspeptidase; major glutathione-degrading enzyme
GAP1	General amino acid permease; involved in uptake of all L-amino acids
GAT1	Transcriptional activator of nitrogen catabolite repression genes
GDH2-SC	NAD(+)-dependent glutamate dehydrogenase; degrades glutamate to ammonia and alpha-ketoglutarate
GDH3	NADP-Glutamic acid dehydrogenase-Ammonia to Glutamate
GLN1-PNC	Glutamine synthetase (GS); synthesizes glutamine from glutamate and ammonia
GZF3	GATA zinc finger protein; negatively regulates nitrogen catabolic gene expression
LAP4	Vacuolar aminopeptidase yscI
MEP1	Ammonium permease
MEP2	Ammonium permease involved in regulation of pseudohyphal growth
MEP3	Ammonium permease of high capacity and low affinity
PEP4-PNC	Vacuolar aspartyl protease (proteinase A)
PUT1	Proline oxidase
PUT2-PNC	Mitochondrial Delta-1-pyrroline-5-carboxylate dehydrogenase
PUT4	Proline permease
UGA1-PNC	Gamma-aminobutyrate (GABA) transaminase; also known as 4-aminobutyrate aminotransferase
UGA4	GABA (gamma-aminobutyrate) permease
VID30	Central component of GID Complex, involved in FBPase degradation
YGR125W-SC	Vacuolar membrane protein required for uptake and storage of arginine in nitrogen-replete cells
YHI9-SC	Protein of unknown function
Putative NCR-Sensitive
AAH1-PNC	Adenine deaminase (adenine aminohydrolase); involved in purine salvage
ALD4-SC	Mitochondrial aldehyde dehydrogenase; required for growth on ethanol and conversion of acetaldehyde to acetate
ARG4-SC	Argininosuccinate lyase; catalyzes the final step in the arginine biosynthesis pathway
AVT1	Argininosuccinate lyase; catalyzes the final step in the arginine biosynthesis
AVT4	Vacuolar transporter; exports large neutral amino acids from the vacuole
AVT7	Vacuolar amino acid transporter
CHA1-SC	Catabolic L-serine (L-threonine) deaminase; catalyzes the degradation of both L-serine and L-threonine
DIP5	Dicarboxylic amino acid permease; mediates high-affinity and high-capacity transport of L-glutamate and L-aspartate
ECM37	Mitochondrial outer membrane protein required to initiate mitophagy
GCN4	bZIP transcriptional activator of amino acid biosynthetic genes
GDH1-PNC	NADP(+)-dependent glutamate dehydrogenase; synthesizes glutamate from ammonia and alpha-ketoglutarate
GGC1-SC	Mitochondrial GTP/GDP transporter
GLT1-PNC	NAD(+)-dependent glutamate synthase (GOGAT); synthesizes glutamate from glutamine and alpha-ketoglutarate
GUD1	Guanine deaminase; a catabolic enzyme of the guanine salvage pathway producing xanthine and ammonia
HXK1-SC	Hexokinase isoenzyme 1; a cytosolic protein that catalyzes phosphorylation of glucose
LEE1	Zinc-finger protein of unknown function
MIG2	Zinc finger transcriptional repressor; cooperates with Mig1p in glucose-induced gene repression
MOH1	protein of unknown function, essential for stationary phase survival
NIT1	Nitrilase
NPR2	Subunit of the Iml1p/SEACIT complex; SEACIT (Iml1p-Npr2p-Npr3p)
NRK1	Nicotinamide riboside kinase; catalyzes the phosphorylation of nicotinamide riboside
OPT1	Proton-coupled oligopeptide transporter of the plasma membrane; also transports glutathione
OPT2	Oligopeptide transporter; localized to peroxisomes and affects glutathione redox homeostasis
PMP1	Regulatory subunit for the plasma membrane H(+)-ATPase Pma1p
PTR2	Integral membrane peptide transporter; mediates transport of di- and tri-peptides
RNY1-SC	Vacuolar RNase of the T(2) family; relocalizes to the cytosol where it cleaves tRNAs upon oxidative or stationary phase stress
RPS0B-PNC	Protein component of the small (40S) ribosomal subunit
RSM10	Mitochondrial ribosomal protein of the small subunit
RTS3-SC	Putative component of the protein phosphatase type 2A complex
SDL1	Blocked reading frame otherwise encoding L-serine dehydratase
SLX9-PNC	Protein required for pre-rRNA processing; associated with the 90S pre-ribosome and 43S small ribosomal subunit precurso
UGA3	Transcriptional activator for GABA-dependent induction of GABA genes
UGX2	Protein of unknown function; transcript accumulates in response to any combination of stress conditions
URK1	Uridine/cytidine kinase; component of the pyrimidine ribonucleotide salvage pathway
VBA1	Permease of basic amino acids in the vacuolar membrane
YDL237W-PNC	Protein of unknown function; required for respiratory growth
YDR090C	Protein of unknown function; deletion confers sensitivity to cationic compounds
YGK3	Protein kinase related to mammalian GSK-3 glycogen synthase kinases
YGL196W-PNC	D-serine dehydratase (aka D-serine ammonia-lyase); converts D-serine to pyruvate and ammonia
YHR138C	Protein of unknown function; similar to Pbi2p
YJR011C	Putative protein of unknown function
YLR149C	Protein of unknown function; overexpression causes a cell cycle delay or arrest
YLR257W-PNC	Protein of unknown function; protein abundance increases in response to DNA replication stress
YOR052C	AN1-type zinc finger protein, effector of proteotoxic stress response; stress-inducible transcriptional target of Rpn4p
GATA Elements in Promoter
ACE2	Transcription factor required for septum destruction after cytokinesis
ALT1-SC	Alanine transaminase (glutamic pyruvic transaminase); involved in alanine biosynthesis and catabolism
APE2-PNC	Aminopeptidase yscII
COX12	Subunit VIb of cytochrome c oxidase; cytochrome c oxidase
ECM15-SC	Non-essential protein of unknown function
FMP16	Protein of unknown function; may be involved in responding to conditions of stress
GPG1	Proposed gamma subunit of the heterotrimeric G protein; involved in regulation of pseudohyphal growth
GRX1-PNC	Glutathione-dependent disulfide oxidoreductase
HOR7	Protein of unknown function
ICY1	Protein of unknown function; induced by amino acid starvation
INO4	Transcription factor involved in phospholipid synthesis
LAP3-PNC	Cysteine aminopeptidase with homocysteine-thiolactonase activity
PBI2-PNC	Cytosolic inhibitor of vacuolar proteinase B (PRB1
PHM8-SC	Lysophosphatidic acid (LPA) phosphatase, nucleotidase
PMP3	Small plasma membrane protein; confers resistance to amphotericin B
PRB1-PNC	Vacuolar proteinase B (yscB) with H3 N-terminal endopeptidase activity; serine protease
PRC1-PNC	Vacuolar carboxypeptidase Y (proteinase C
PST2-PNC	FMN-dependent NAD(P)H:quinone oxidoreductase
QDR2-SC	Plasma membrane transporter of the major facilitator superfamily;
RAS2-PNC	GTP-binding protein; regulates nitrogen starvation response, sporulation, and filamentous growth
RPN6-PNC	Essential, non-ATPase regulatory subunit of the 26S proteasome lid
RPT2-PNC	ATPase of the 19S regulatory particle of the 26S proteasome
SNA2	Protein of unknown function; has similarity to Pmp3p, which is involved in cation transport
YBR085C-A- PNC	Protein of unknown function
YER030W-PNC	Histone chaperone for Htz1p/H2A-H2B dimer
YET1-PNC	Endoplasmic reticulum transmembrane protein; may interact with ribosomes
YFR055W	yfr055wCysteine desulphydrase, enables growth on cysteine as nitrogen source; expression induced by nitrogen limitation
YIL087C	Protein of unknown function; mitochondrial protein
YIL165C	Putative protein of unknown function; mutant exhibits mitophagy defects
YJR096W-PNC	Xylose and arabinose reductase
YKL137W	Copper-binding protein of the mitochondrial intermembrane space
YKR033C	Dubious open reading frame; unlikely to encode a functional protein; partially overlaps the verified gene DAL80
YLR149C	Protein of unknown function; overexpression causes a cell cycle delay or arrest
YLR164W	Putative alternate subunit of succinate dehydrogenase (SDH); mitochondrial inner membrane protein
YMR181C	Protein of unknown function
YMR196W-SC	Putative protein of unknown function
YMR226C-PNC	NADP(+)-dependent serine dehydrogenase and carbonyl reductase; acts on serine, L-allo-threonine
YOL019W	Protein involved in secretion and cell wall organization
YPR098C	Mitochondrial protein of unknown function
ZSP1	Protein of unknown function
*Protein not represented in our data set
*Protein present in our data set but no significant change
*Protein present in our data set with significant change
