# Supplementary material for: Effects of abolishing Whi2 on the proteome and nitrogen catabolite repression-sensitive protein production
Source: G3 (Bethesda). 2021 Dec 17;12(3):jkab432. doi: 10.1093/g3journal/jkab432 (PMC9210300; doi:10.1093/g3journal/jkab432)
Supplement: jkab432_Supplementary_Table_S7 [file jkab432_supplementary_table_s7.xlsx]

## Sheet: Sheet4
Table S-7
All known and probable NCR-sensitive genes and those with GATA elements in their promoter regions
Terms from the Process Ontology of gene association.sgd with a Corrected p-value less than 0.01
Gene Ontology term	Cluster frequency	Genome frequency	Corrected	FDR	FALSE	Genes annotated to the term
			p-value		Positives
cellular amino acid catabolic process	16 of 122 genes, 13.1%	60 of 7166 genes, 0.8%	7.38e-13	0	0	ALT1, UGA1, LAP3, CAR1, BAT2, YFR055W, PUT2, ASP3-2, ASP3-3, ASP3-1, UGA3, CHA1, ASP3-4, PUT1, YGL196W, GDH2
organonitrogen compound catabolic process	32 of 122 genes, 26.2%	410 of 7166 genes, 5.7%	5.86e-11	0	0	APE2, ASP3-1, DAL3, GUD1, PUT2, CAR1, UGA1, LAP3, CPS1, ASP3-4, SNA2, RPN6, DUR1,2, AAH1, DAL1, ASP3-3, ASP3-2, YFR055W, BAT2, ALT1, PEP4, PUT1, YGL196W, RPT2, GDH2, ECM38, DAL4, DAL2, CHA1, VID30, DAL7, UGA3
nitrogen utilization	10 of 122 genes, 8.2%	22 of 7166 genes, 0.3%	3.88e-10	0	0	MEP3, VID30, UGA3, MEP2, MEP1, DAL80, YFL021W, GCN4, GLT1, GZF3
small molecule metabolic process	42 of 122 genes, 34.4%	829 of 7166 genes, 11.6%	9.34e-09	0	0	UGA3, VID30, HXK1, DAL7, DAL2, GLN1, DAL4, CHA1, YJR096W, PUT1, GDH2, YGL196W, DAL80, ALT1, PHM8, BAT2, YFR055W, YNL129W, GLT1, URK1, GDH3, ASP3-2, ASP3-3, DAL1, YIL167W, RAS2, AAH1, DUR1,2, ASP3-4, ARG4, GDH1, GCN4, UGA1, LAP3, CAR1, YLR164W, COX12, PUT2, DAL3, GUD1, ALD4, ASP3-1
glutamine family amino acid metabolic process	13 of 122 genes, 10.7%	62 of 7166 genes, 0.9%	1.09e-08	0	0	CAR1, PUT2, ASP3-2, GDH3, GLN1, GLT1, ASP3-1, GDH2, GDH1, PUT1, ARG4, ASP3-4, ASP3-3
cellular amino acid metabolic process	23 of 122 genes, 18.9%	251 of 7166 genes, 3.5%	1.14e-08	0	0	UGA3, CHA1, GLN1, ASP3-4, ARG4, PUT1, YGL196W, GDH2, GDH1, GCN4, ALT1, LAP3, UGA1, CAR1, BAT2, YFR055W, PUT2, GLT1, GDH3, ASP3-2, ASP3-3, YIL167W, ASP3-1
catabolic process	45 of 122 genes, 36.9%	972 of 7166 genes, 13.6%	2.89e-08	0	0	VID30, DAL7, HXK1, UGA3, PUT1, YJR096W, YGL196W, GDH2, RPT2, ECM38, CHA1, DAL4, DAL2, YFR055W, BAT2, ATG32, ALT1, PEP4, PHM8, YBR139W, DAL1, NPR2, ASP3-3, PRC1, YIL165C, RNY1, ASP3-2, RPN6, DUR1,2, AAH1, ATG14, RAS2, CPS1, ASP3-4, SNA2, GCN4, PUT2, YFL021W, CAR1, LAP3, UGA1, APE2, ASP3-1, DAL3, GUD1
amino acid transport	12 of 122 genes, 9.8%	56 of 7166 genes, 0.8%	5.15e-08	0	0	AVT7, YGR125W, GAP1, AVT4, AVT1, AGP1, NPR2, CAN1, DIP5, PUT4, UGA4, VBA1
allantoin catabolic process	6 of 122 genes, 4.9%	7 of 7166 genes, 0.1%	7.52e-08	0	0	DAL7, DUR1,2, DAL1, DAL4, DAL2, DAL3
organic acid transport	13 of 122 genes, 10.7%	95 of 7166 genes, 1.3%	2.88e-06	0	0	GAP1, DAL5, AVT4, AVT1, AVT7, YGR125W, PUT4, DIP5, VBA1, UGA4, AGP1, NPR2, CAN1
cellular response to nitrogen starvation	7 of 122 genes, 5.7%	20 of 7166 genes, 0.3%	1.13e-05	0	0	ASP3-2, YFL021W, GCN4, ASP3-1, ASP3-4, ASP3-3, NPR2
proline transport	5 of 122 genes, 4.1%	7 of 7166 genes, 0.1%	1.36e-05	0	0	NPR2, AGP1, PUT4, AVT1, GAP1
purine nucleobase metabolic process	7 of 122 genes, 5.7%	21 of 7166 genes, 0.3%	1.68e-05	0	0	DAL3, GUD1, DAL4, DAL2, DAL1, AAH1, DAL7
glutamate metabolic process	6 of 122 genes, 4.9%	14 of 7166 genes, 0.2%	2.92e-05	0	0	GDH2, PUT2, GDH1, PUT1, GLT1, GDH3
regulation of nitrogen utilization	6 of 122 genes, 4.9%	15 of 7166 genes, 0.2%	4.8e-05	0	0	VID30, GCN4, YFL021W, DAL80, GZF3, UGA3
nucleobase metabolic process	8 of 122 genes, 6.6%	36 of 7166 genes, 0.5%	5.75e-05	0	0	DAL1, DAL2, DAL4, GUD1, DAL3, DAL7, AAH1, PHM8
glutamate biosynthetic process	5 of 122 genes, 4.1%	9 of 7166 genes, 0.1%	7.95e-05	0	0	GLT1, GDH3, PUT1, GDH1, PUT2
glutamine family amino acid biosynthetic process	7 of 122 genes, 5.7%	26 of 7166 genes, 0.4%	8.87e-05	0	0	GLN1, GLT1, GDH3, PUT1, ARG4, GDH1, PUT2
aromatic amino acid transport	5 of 122 genes, 4.1%	11 of 7166 genes, 0.2%	0.00028	0	0	AVT7, AGP1, GAP1, AVT1, AVT4
ion transport	22 of 122 genes, 18.0%	393 of 7166 genes, 5.5%	0.0003	0	0	UGA4, VBA1, AVT1, PMP3, MEP2, GAP1, QDR2, MEP3, AVT7, DIP5, PUT4, NPR2, CAN1, AGP1, AVT4, DUR3, MEP1, PTR2, DAL5, YGR125W, OPT2, COX12
aspartate family amino acid catabolic process	5 of 122 genes, 4.1%	12 of 7166 genes, 0.2%	0.00047	0	0	CHA1, ASP3-2, ASP3-1, ASP3-4, ASP3-3
asparagine catabolic process	4 of 122 genes, 3.3%	6 of 7166 genes, 0.1%	0.00059	0	0	ASP3-2, ASP3-1, ASP3-4, ASP3-3
purine nucleobase catabolic process	3 of 122 genes, 2.5%	3 of 7166 genes, 0.0%	0.00243	0	0	GUD1, AAH1, DAL1
alpha-amino acid biosynthetic process	11 of 122 genes, 9.0%	120 of 7166 genes, 1.7%	0.00271	0	0	GDH3, GLN1, CHA1, GLT1, PUT1, ARG4, GDH1, ALT1, PUT2, YFR055W, BAT2
oligopeptide transmembrane transport	4 of 122 genes, 3.3%	9 of 7166 genes, 0.1%	0.00477	0	0	OPT1, PTR2, DAL5, OPT2
proline transmembrane transport	3 of 122 genes, 2.5%	4 of 7166 genes, 0.1%	0.00962	0	0	GAP1, PUT4, AGP1
