# Supplementary material for: Effects of abolishing Whi2 on the proteome and nitrogen catabolite repression-sensitive protein production
Source: G3 (Bethesda). 2021 Dec 17;12(3):jkab432. doi: 10.1093/g3journal/jkab432 (PMC9210300; doi:10.1093/g3journal/jkab432)
Supplement: jkab432_Supplementary_Table_S13 [file jkab432_supplementary_table_s13.xlsx]

## Sheet: Sheet1
Table S-13
Proteins whose levels change by an absolute Log2 value equal to or greater than one in a whi2D (P1-whi2)
relative to Wild Type (P1) in SCH medium
Terms from the Process Ontology of gene association.sgd with a Corrected p-value equal to or less than 0.01
Gene Ontology term	Cluster frequency	Genome frequency	Corrected	FDR	FALSE	Genes annotated to the term
			p-value		Positives
carbohydrate catabolic process	4 of 17 genes, 23.5%	90 of 7166 genes, 1.3%	0.00689	0	0	XKS1, GPH1, HXK1, PGM2
