# Supplementary material for: Effects of abolishing Whi2 on the proteome and nitrogen catabolite repression-sensitive protein production
Source: G3 (Bethesda). 2021 Dec 17;12(3):jkab432. doi: 10.1093/g3journal/jkab432 (PMC9210300; doi:10.1093/g3journal/jkab432)
Supplement: jkab432_Supplementary_Table_S15_S16 [file jkab432_supplementary_table_s15_s16.xlsx]

## Sheet: Sheet1
Table S-15
Proteins whose levels change by an absolute Log2 value of equal to or greater than 1 in a whi2D (P1-whi2)
relative to Wild Type (P1) after one Hr in ME medium
Terms from the Process Ontology of gene association.sgd with a Corrected p-value equal to or less than 0.01
Gene Ontology term	Cluster frequency	Genome frequency	Corrected	FDR	FALSE	Genes annotated to the term
			p-value		Positives
glucose 6-phosphate metabolic process	3 of 20 genes, 15.0%	21 of 7166 genes, 0.3%	0.00574	0	0	HXK1, PGM2, SOL4
Table S-16
Proteins whose levels change by an absolute Log2 value equal to or greater than 1 in a whi2D (P1-whi2)
relative to Wild Type (P1) after 1 Hr in ME medium
Terms from the Function Ontology of gene association.sgd with a Corrected p-value equal to or less than 0.01
Gene Ontology term	Cluster frequency	Genome frequency	Corrected	FDR	FALSE	Genes annotated to the term
			p-value		Positives
transferase activity, transferring phosphorus-containing groups	7 of 20 genes, 35.0%	374 of 7166 genes, 5.2%	0.00175	0	0	HXK1, POL2, UBA4, KSS1, CDC8, PSK2, SGV1
