# Supplementary material for: Effects of abolishing Whi2 on the proteome and nitrogen catabolite repression-sensitive protein production
Source: G3 (Bethesda). 2021 Dec 17;12(3):jkab432. doi: 10.1093/g3journal/jkab432 (PMC9210300; doi:10.1093/g3journal/jkab432)
Supplement: jkab432_Supplementary_Table_S18 [file jkab432_supplementary_table_s18.xlsx]

## Sheet: Sheet2
Table S-18
Proteins whose levels changed by a Log2 value less than -1 in a whi2D (P1-whi2)
relative to wild type (P1) after six Hrs in ME medium
Terms from the Process Ontology of gene association.sgd with a Corrected p-value equal to or less than 0.01
Gene ontology term	Cluster frequence	Genome frequency	Corrected p-value	FDR	False positives	Genes annotated to the term
glycogen metabolic process	6 of 47 genes, 12.8%	34 of 7166 genes, 0.5%	2.27e-05	0	0	PGM2, YPI1, GDB1, GSY2, PSK2, GPH1
energy reserve metabolic process	6 of 47 genes, 12.8%	36 of 7166 genes, 0.5%	3.26e-05	0	0	GSY2, GDB1, YPI1, PGM2, GPH1, PSK2
carbohydrate metabolic process	12 of 47 genes, 25.5%	281 of 7166 genes, 3.9%	5.43e-05	0	0	YML100W, GCY1, YPI1, SOL4, YMR196W, PSK2, GDB1, GSY2, PGM2, GPM2, GPH1, HXK1
generation of precursor metabolites and energy	10 of 47 genes, 21.3%	200 of 7166 genes, 2.8%	0.00016	0	0	HXK1, PLN1, PSK2, GPH1, GPM2, YPI1, PGM2, OLE1, GSY2, GDB1
cellular response to oxidative stress	7 of 47 genes, 14.9%	110 of 7166 genes, 1.5%	0.00213	0	0	HSP31, YAP1, GCY1, GAD1, CCP1, UGA2, AFG1
carbohydrate catabolic process	6 of 47 genes, 12.8%	90 of 7166 genes, 1.3%	0.008	0	0	GPM2, PGM2, HXK1, GDB1, GCY1, GPH1
